# Supplementary material
Source: publisher figshare collection journal article supplement (https://aacr.figshare.com/articles/dataset/_/22456001)
Supplement: Supplementary file 1 [file 39907157]

**Figure S2. Clearance of IMMU-132 from mouse serum.** (A) Measurement of SN-38 release from IMMU-132 held in mouse serum *in vitro* (37 °C). (B) Determination of IMMU-132 clearance rate in mice based on ELISA measurements of IMMU-132 (SN-38 capture/anti- hRS7 idiotype antibody probe) or hRS7 IgG, as well as measurement of SN-38 [TOTAL] in acid-hydrolyzed samples assayed by reversed-phase HPLC.

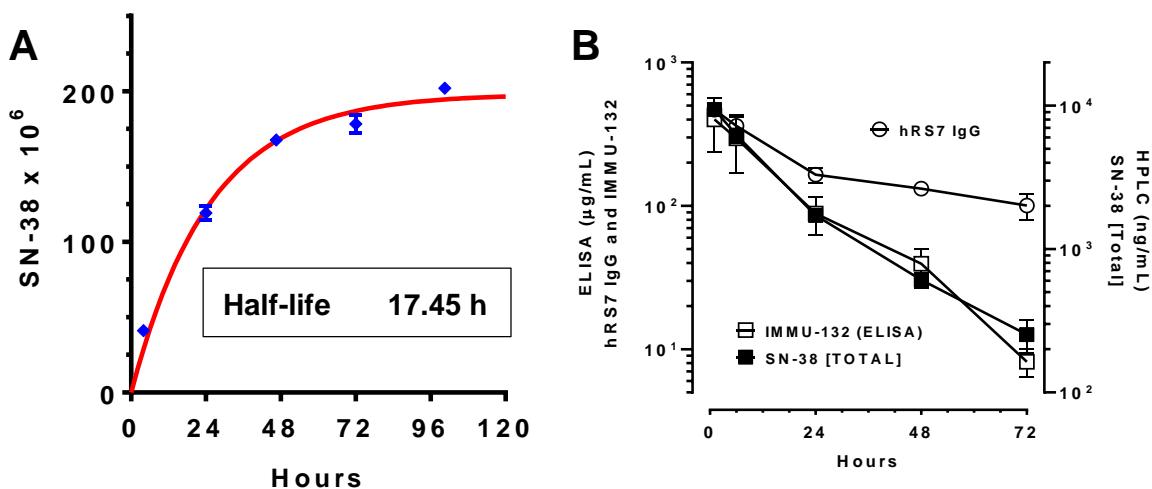

**C**

(C) Pharmacokinetic parameters after IV bolus dosing of IMMU-132 (1.0 mg), monitoring the clearance of IMMU-132 and hRS7 IgG detected by ELISA

| Drug     | T <sub>max</sub> (h) | T <sub>½</sub> (h) | C <sub>max</sub> (µg/mL) | AUC <sub>(0-last)</sub> (h*µg/mL) | V (mL) | Cl (mL/h) | MRT (h) |
|----------|----------------------|--------------------|--------------------------|-----------------------------------|--------|-----------|---------|
| IMMU-132 | 1                    | 14.0               | 400.7                    | 7,163                             | 2.75   | 0.136     | 19.0    |
| hRS7 IgG | 1                    | 67.1               | 468.2                    | 13,368                            | 4.19   | 0.043     | 86.7    |

Parameters estimated using a non-compartmental analysis (linear-log trapezoidal method).
